# Supplementary material
Source: PubMed Central journal article supplement (PMC4854705)
Supplement: supp_pp.16.00107_PP2016-00107DR1_Supplemental_Table.pdf [file supp_pp.16.00107_PP2016-00107DR1_Supplemental_Table.pdf]

1 **Supplemental Table S1. PCR Primers.**

| <b>Primer</b>  | <b>Sequence</b>                                                  |
|----------------|------------------------------------------------------------------|
| FRbcL          | CAACCTCGAAGCCGTGTTGC                                             |
| RRbcL          | GGCTGTTAGCTCCGACTCTG                                             |
| FRbcL-GFP      | AAAGAGATCAAGTTCGAATTCGAAACGATGGACAAGCTCCTGC<br>CGGGCCCCGGAGCTGCC |
| RRbcL-GFP      | GCAGCAACGCTCACTCCCCAGCGATAGTCAGAGGCTCCATTC<br>CGGGGATCCGTCGACC   |
| FRbcL-GFP_seg  | CTTCGTGAAGCTGGCAAGTG                                             |
| RRbcL-GFP_seg  | CTCGAAACGACGCTCTTTGG                                             |
| GFP_rev        | TGGTGCAGATGAACTTCAGG                                             |
| FCcmK4         | AGCGGTGATTGCAAGACACG                                             |
| RCcmK4         | AACGCCAAAGCCACCATGAG                                             |
| FCcmK4-GFP     | TATCGACTCTCTGCCGAAGGAAGTGGTAGTGGCCGCCGTCTGC<br>CGGGCCCCGGAGCTGCC |
| RCcmK4-GFP     | CCCTCAGCCCAAATCAACCCTTTTAATCAGTCGCTACCCATTCC<br>GGGGATCCGTCGACC  |
| FCcmK4-GFP_seg | GCCCAGAAGTGAACAATA                                               |
| RCcmK4-GFP_seg | TGAGGTCCTTCCCTATCAAA                                             |

2
